# Supplementary material
Source: publisher figshare collection journal article supplement (https://acs.figshare.com/ndownloader/files/20180507)
Supplement: Supplementary file 1 [file 20180507]

## Supporting information

# Atomically Embedded Ag via Electro-diffusion Boosts Oxygen Evolution of CoOOH Nanosheet Arrays

Changsoo Lee<sup>1‡</sup>, Kihyun Shin<sup>2‡</sup>, Chanwon Jung<sup>1‡</sup>, Pyuck-Pa Choi<sup>1</sup>, Graeme

Henkelman<sup>2\*</sup>, and Hyuck Mo Lee<sup>1\*</sup>

<sup>1</sup>Department of Materials Science and Engineering, KAIST, 291 Daehak-ro, Yuseong-gu, Daejeon, 34141, Republic of Korea

<sup>2</sup>Department of Chemistry, and the Oden Institute for Computational Engineering and Sciences, University of Texas at Austin, Austin, Texas 78712, United States

<sup>‡</sup>These authors contributed equally to this work.

\* Corresponding author E-mail: [henkelman@utexas.edu](mailto:henkelman@utexas.edu), [hmlee@kaist.ac.kr](mailto:hmlee@kaist.ac.kr)

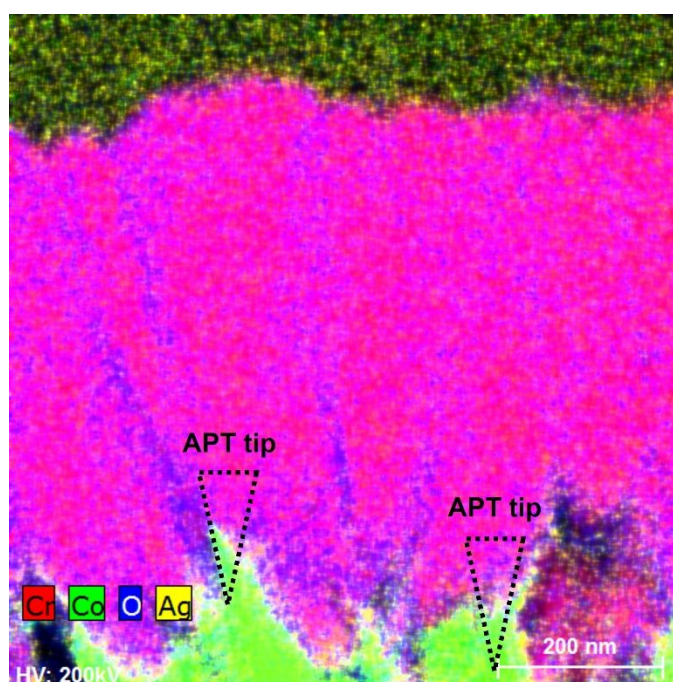

**Figure S1.** EDS map of cross-section of the Cr-coated Ag-doped CoOOH electrocatalysts: lift-off of APT tips are described as the dashed lines.

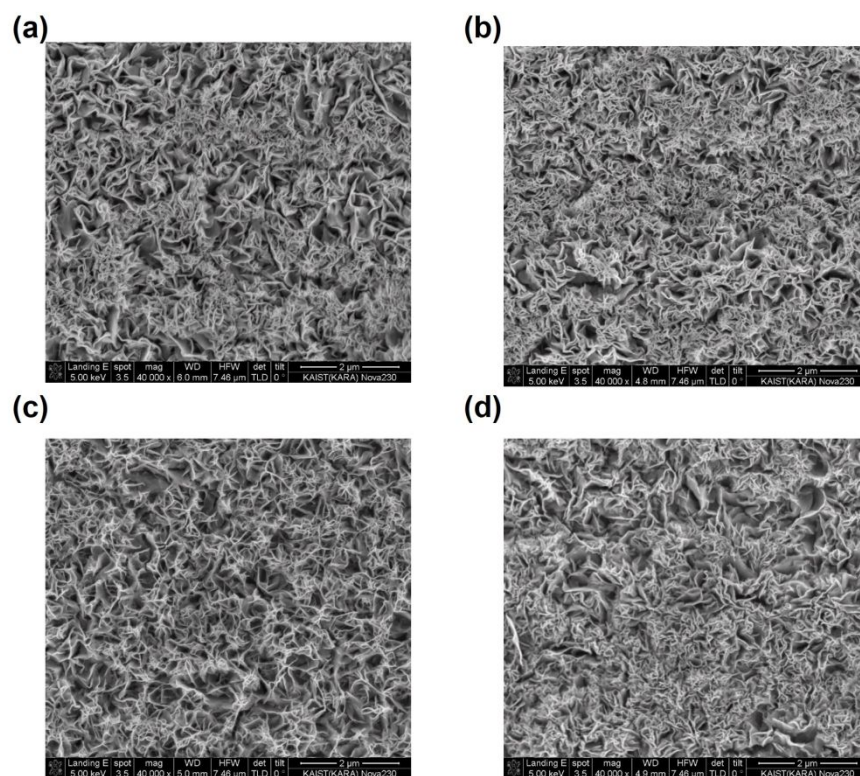

**Figure S2.** Surface morphologies of CoOOH on each metallic substrate: (a) Ag, (b) Au, (c) Cu, and (d) Ni.

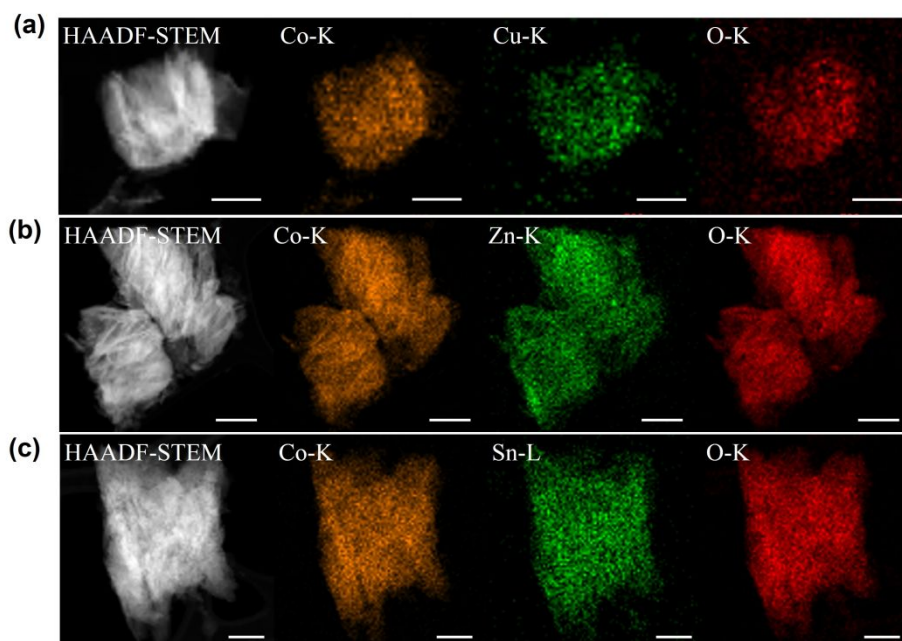

**Figure S3.** EDS elemental maps of exfoliated CoOOH on (a) Cu, (b) Zn, and (c) Sn substrates. Scale bars: (a) 300 nm, (b) 500 nm, and (c) 100 nm.

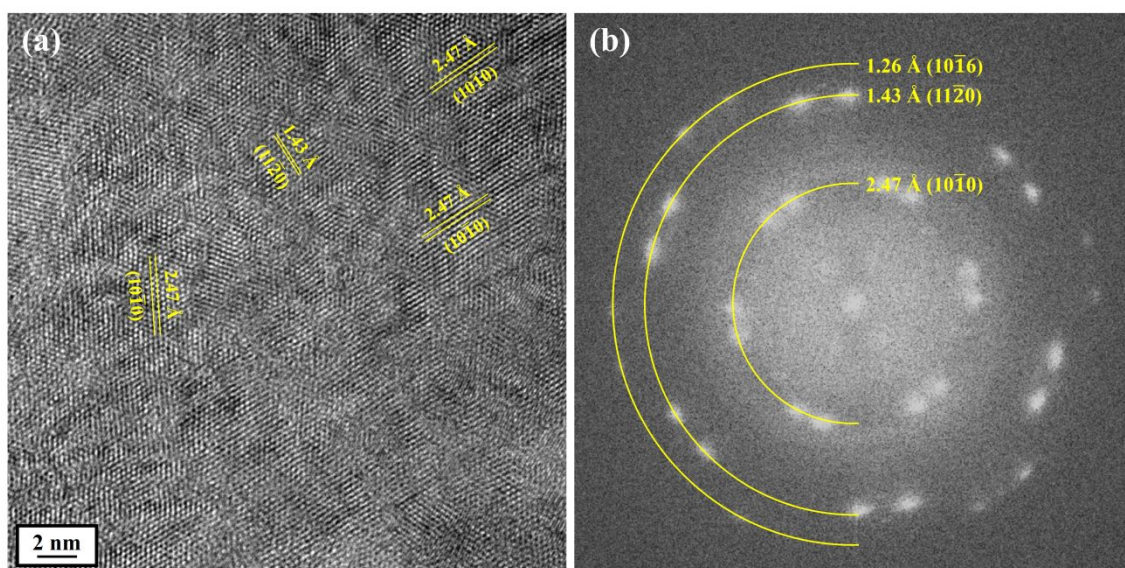

**Figure S4.** (a) HRTEM of Ag-doped CoOOH, and (b) its fast-Fourier transformed selected area electron diffraction pattern (FFT-SAED).

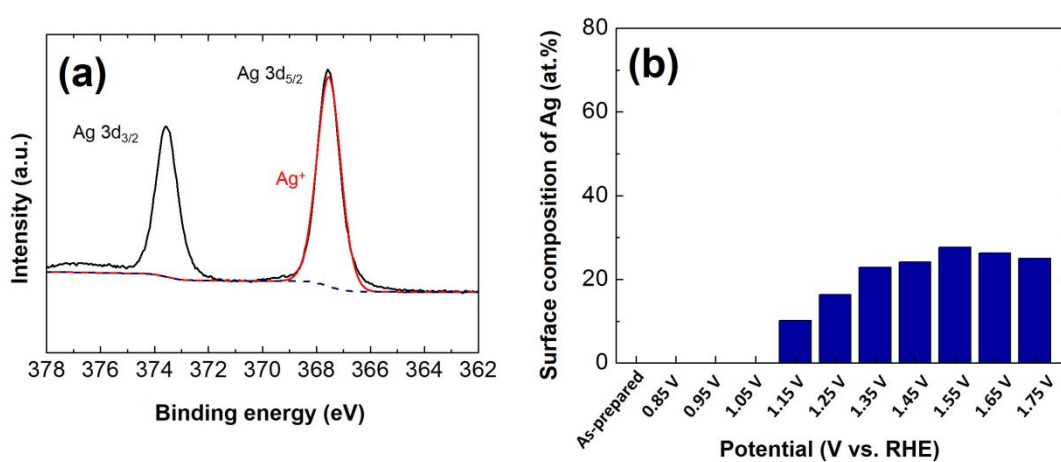

**Figure S5.** (a) XPS Ag 3d peak, and (b) Quantitative XPS analysis of Ag-doped CoOOH with applied voltages ranging from 0.85 V to 1.75 V (vs. RHE), indicating the surface composition at each voltage.



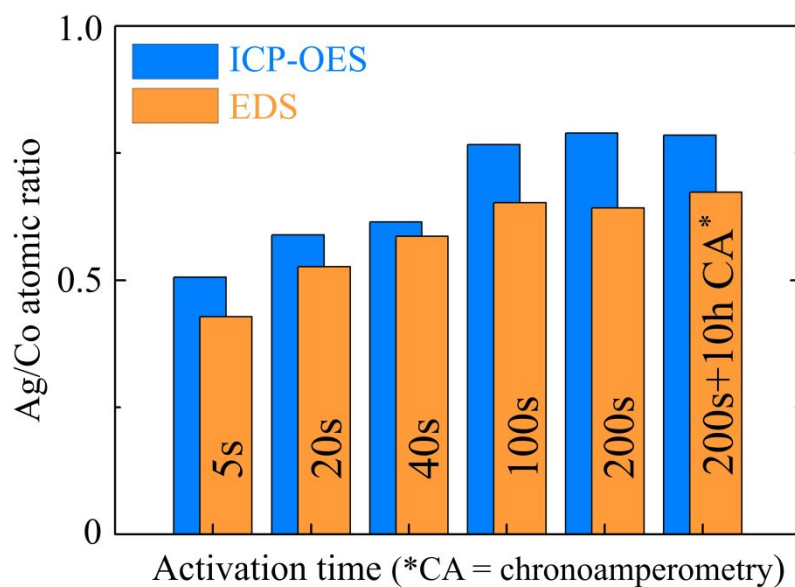

**Figure S6.** Compositional investigation of Ag diffusions at 1.4 V (vs. RHE) with EDS and ICP-OES compositional measurements; 10 h CA was conducted at the overpotential of 300 mV; the compositions were measured with exfoliated electrocatalysts using ultra-sonication for 30 min.

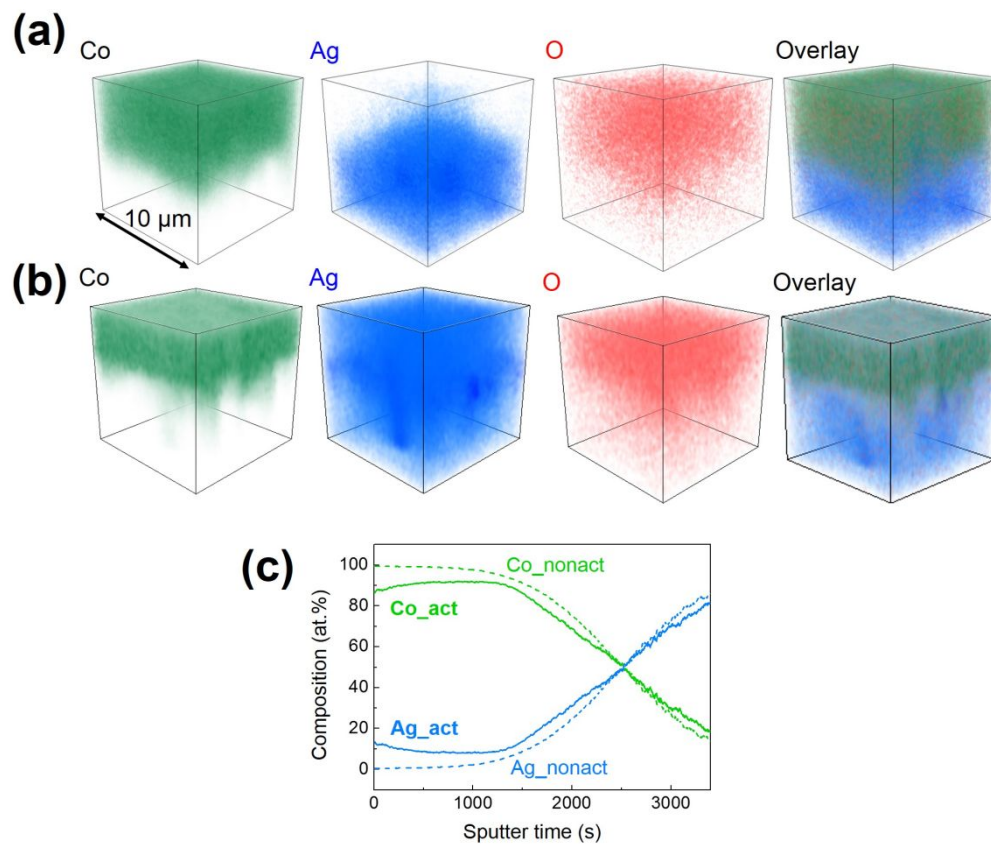

**Figure S7.** SIMS 3D rendering of each element and overlay for Ag-doped CoOOH: (a) before activation, and (b) after activation; (c) their depth profiling.

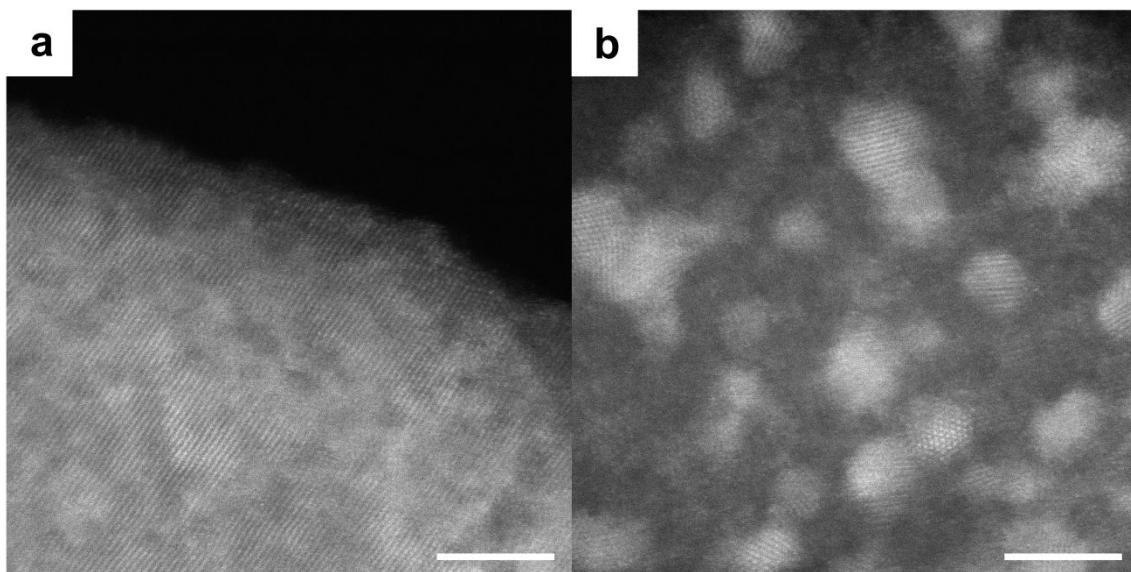

**Figure S8.** HADDF-STEM images of (a) Ag-doped CoOOH, and (b) Ag<sub>2</sub>O/CoOOH after heat-treatment in 80°C for 10 h. Scale bars: (a) and (b) 5 nm.

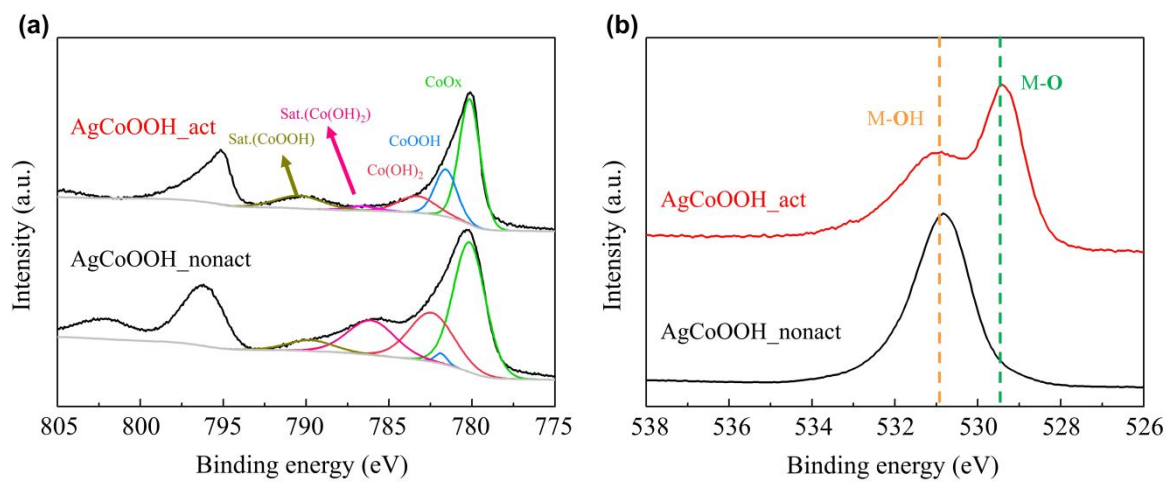

**Figure S9.** (a) XPS Co 2p peaks, and (b) O 1s peaks; for CoOOH on Ag before and after activation.

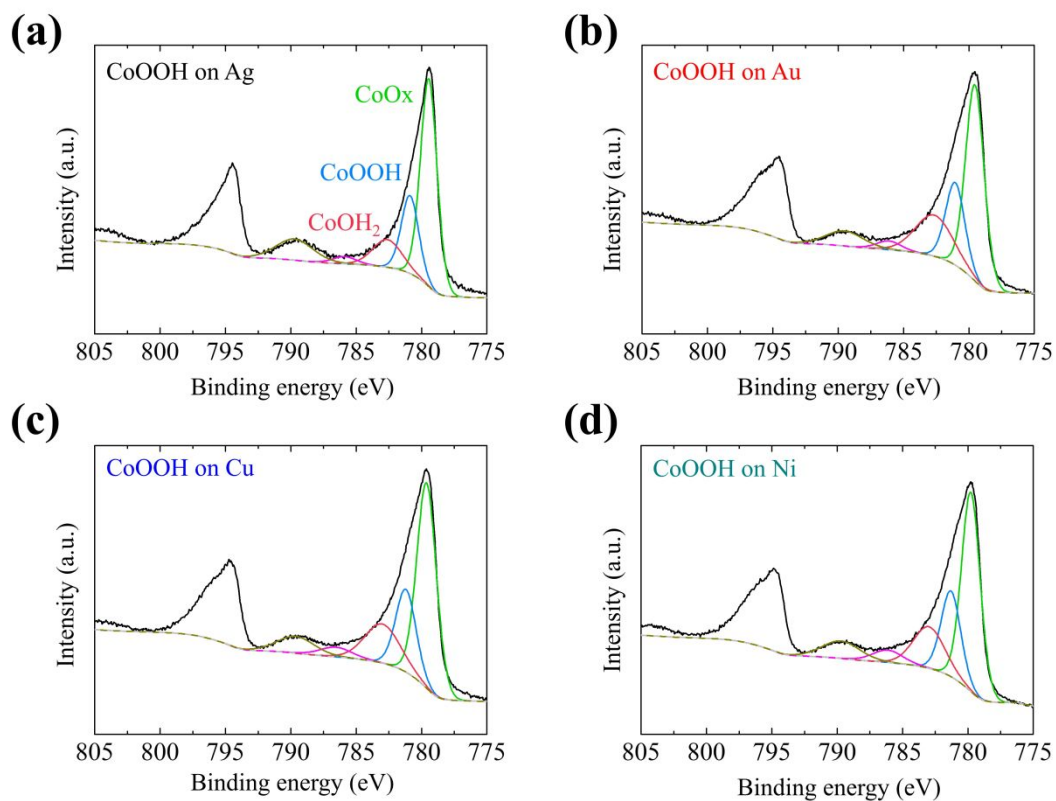

**Figure S10.** XPS Co 2p peaks for CoOOH on (a) Ag, (b) Au, (c) Cu, and (d) Ni, after the activation process.

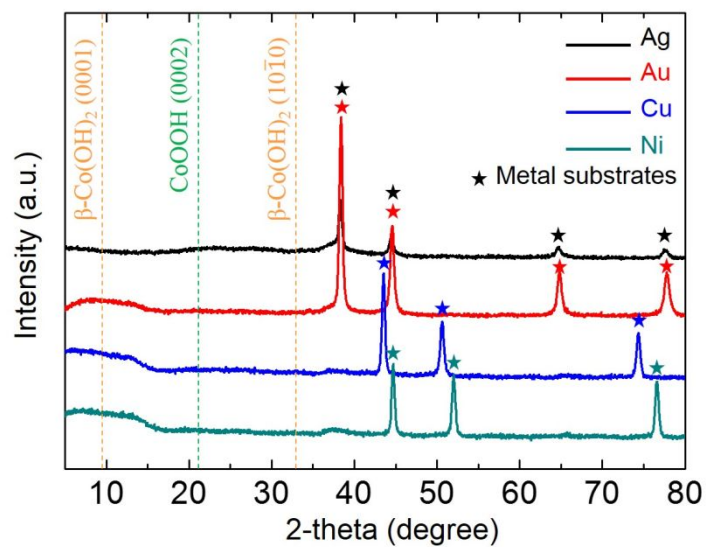

**Figure S11.** XRD analysis of CoOOH on Ag, Au, Cu, and Ni; ICDD No.00-051-1731 and No.01-072-2280 for  $\text{Co}(\text{OH})_2$  and CoOOH, respectively.

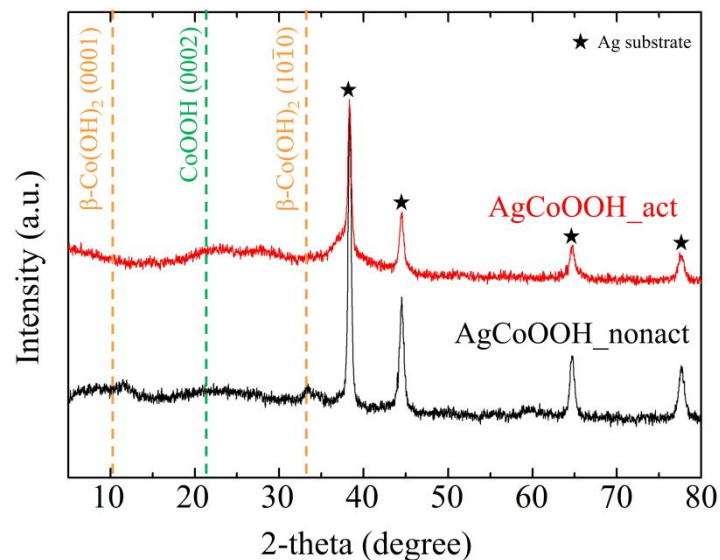

**Figure S12.** XRD analysis of Ag-doped CoOOH before and after activation; ICDD No.00-051-1731 and No.01-072-2280 for  $\text{Co}(\text{OH})_2$  and CoOOH, respectively.

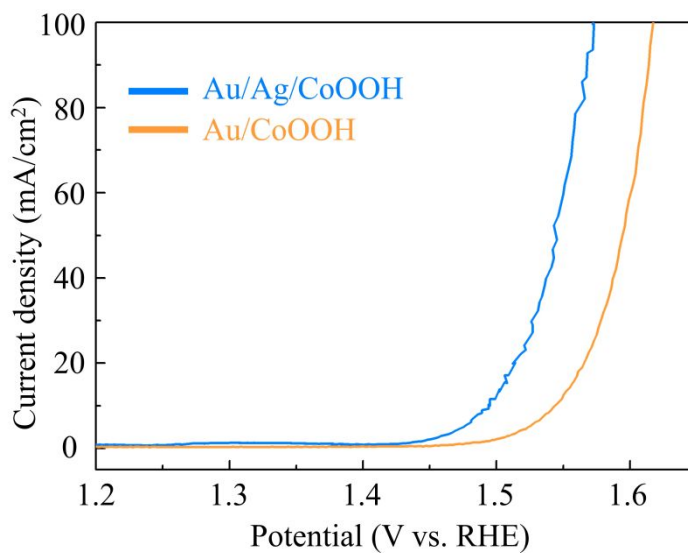

**Figure S13.** OER polarization curves of CoOOH on Au, and CoOOH on Ag electrodeposited Au substrate; Ag was deposited on Au substrate using a two-step chronoamperometry process ( $1 \text{ mA/cm}^2$  for 100 s and  $10 \text{ mA/cm}^2$  for 60 s).

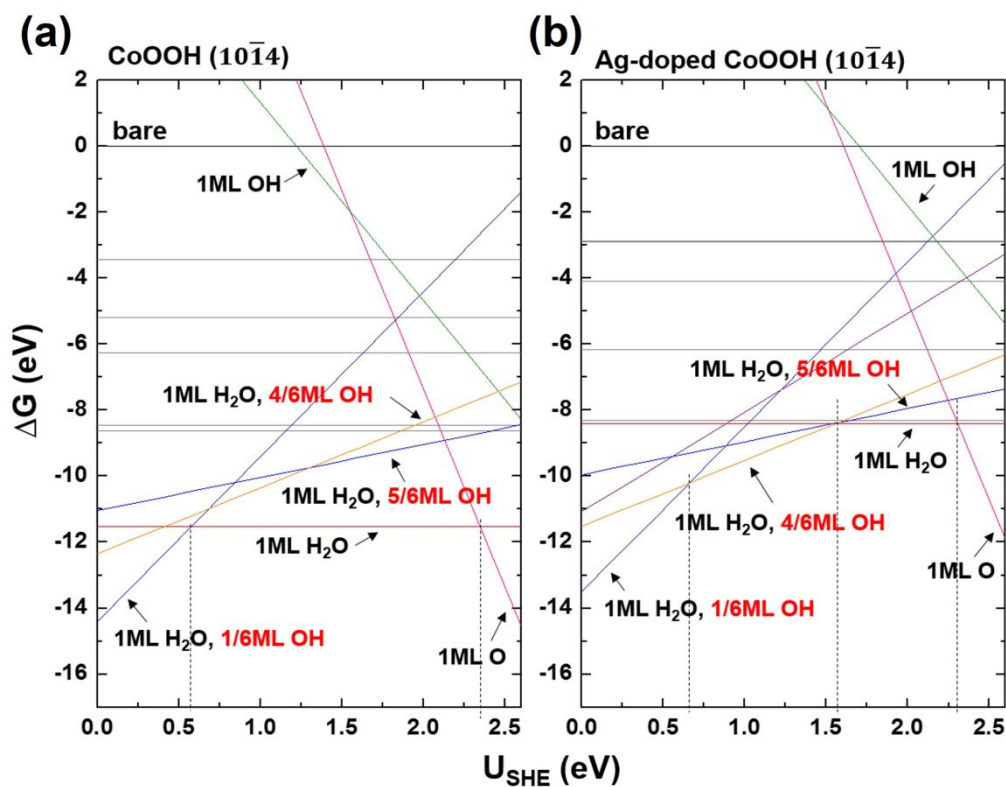

**Figure S14.** Surface free energy diagram of (a) CoOOH (1014), and (b) Ag-doped CoOOH (1014).



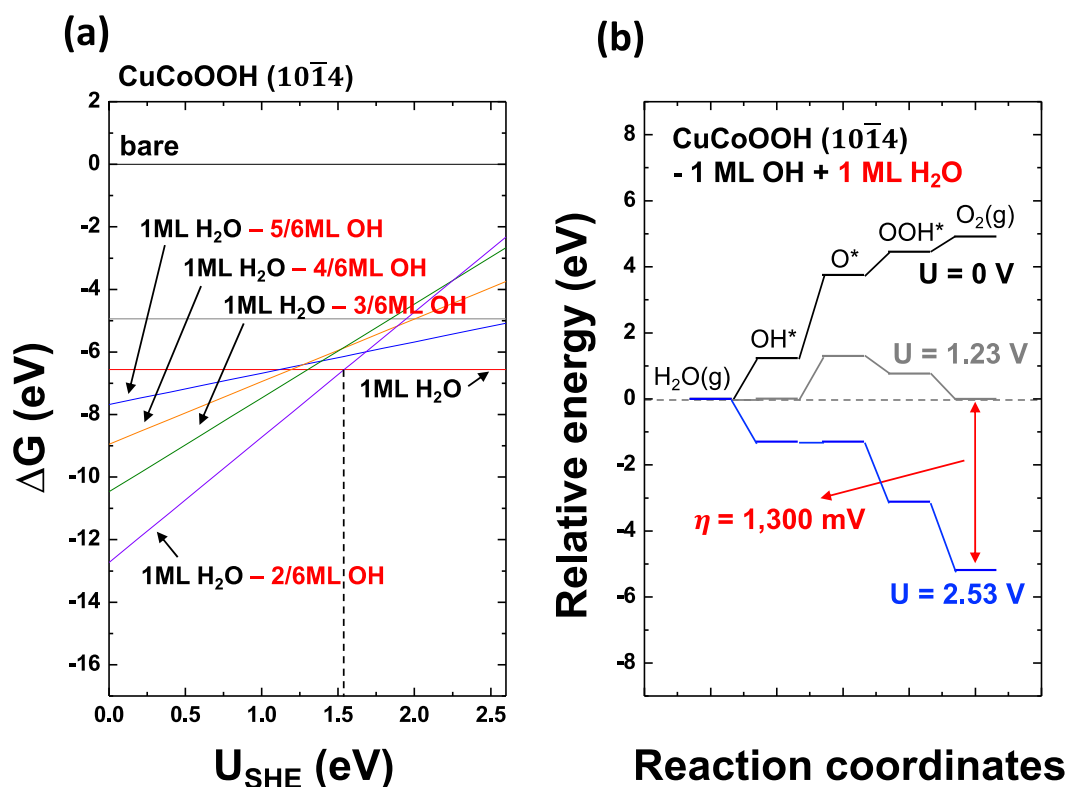

**Figure S15.** Surface free energy diagram of (a) Cu-doped CoOOH (10 $\bar{1}4$ ), and (b) Gibbs free energy diagram with OER overpotential for Cu-doped CoOOH (10 $\bar{1}4$ ).

**Table S1.** EDS compositions of exfoliated CoOOH on Ag, Au, Cu and Ni.

|             | Co (at.%) | X (at.%)     | O (at.%) |
|-------------|-----------|--------------|----------|
| CoOOH on Ag | 20.33     | <b>13.22</b> | 66.44    |
| CoOOH on Au | 31.93     | -            | 68.07    |
| CoOOH on Cu | 32.60     | <b>9.31</b>  | 58.09    |
| CoOOH on Ni | 26.86     | -            | 73.14    |

TEM EDS composition (10 points average)

**Table S2.** Recently reported Co-based electrocatalysts and their OER performances

| Catalysts                                            | Electrodes | Overpotentials<br>(mV) @ 10<br>mA/cm <sup>2</sup> | References |
|------------------------------------------------------|------------|---------------------------------------------------|------------|
| CeO <sub>x</sub> /CoO <sub>x</sub>                   | Ti         | 313                                               | 1          |
| Co doped CuS                                         | GC         | 270                                               | 2          |
| Ag@Co <sub>x</sub> P                                 | GC         | 310                                               | 3          |
| NiCo <sub>2</sub> O <sub>4</sub>                     | Ni foam    | 290                                               | 4          |
| CoNi(OH) <sub>x</sub>                                | Cu foils   | 280                                               | 5          |
| Co-defected Co <sub>3-x</sub> O <sub>4</sub>         | GC         | 268                                               | 6          |
| (Co <sub>1-x</sub> Fe <sub>x</sub> ) <sub>2</sub> P  | -          | 270                                               | 7          |
| CoSn(OH) <sub>6</sub>                                | GC         | 274                                               | 8          |
| NiCoP NWs                                            | GC         | 221                                               | 9          |
| Fe-CoP/CoO                                           | GC         | 219                                               | 10         |
| Co(OH) <sub>2</sub> @g-C <sub>3</sub> N <sub>4</sub> | GC         | 320                                               | 11         |

## References

- Kim, J. H.; Shin, K.; Kawashima, K.; Youn, D. H.; Lin, J.; Hong, T. E.; Liu, Y.; Wygant, B. R.; Wang, J.; Henkelman, G.; Mullins, C. B., Enhanced Activity Promoted by CeO<sub>x</sub> on a CoO<sub>x</sub> Electrocatalyst for the Oxygen Evolution Reaction. *ACS Catal.* **2018**, 8, 4257-4265.
- Li, Q.; Wang, X. F.; Tang, K.; Wang, M. F.; Wang, C.; Yan, C. L., Electronic Modulation of Electrocatalytically Active Center of Cu<sub>7</sub>S<sub>4</sub> Nanodisks by Cobalt-Doping for Highly Efficient Oxygen Evolution Reaction. *ACS Nano* **2017**, 11, 12230-12239.
- Hou, Y. H.; Liu, Y. P.; Gao, R. Q.; Li, Q. J.; Guo, H. Z.; Goswami, A.; Zboril, R.; Gawande, M. B.; Zou, X. X., Ag@Co<sub>x</sub>P Core-Shell Heterogeneous Nanoparticles as Efficient Oxygen Evolution Reaction Catalysts. *ACS Catal.* **2017**, 7, 7038-7042.
- Gao, X. H.; Zhang, H. X.; Li, Q. G.; Yu, X. G.; Hong, Z. L.; Zhang, X. W.; Liang, C. D.; Lin, Z., Hierarchical NiCo<sub>2</sub>O<sub>4</sub> Hollow Microcuboids as Bifunctional Electrocatalysts for Overall Water-Splitting. *Angew. Chem. Int. Edit.* **2016**, 55, 6290-6294.
- Li, S. W.; Wang, Y. C.; Peng, S. J.; Zhang, L. J.; Al-Enizi, A. M.; Zhang, H.; Sun, X. H.; Zheng, G. F., Co-Ni-Based Nanotubes/Nanosheets as Efficient Water Splitting Electrocatalysts. *Adv. Energy Mater.* **2016**, 6, 1501661.
- Zhang, R. R.; Zhang, Y. C.; Pan, L.; Shen, G. Q.; Mahmood, N.; Ma, Y. H.; Shi, Y.; Jia, W. Y.; Wang, L.; Zhang, X. W.; Xu, W.; Zou, J. J., Engineering Cobalt Defects in Cobalt Oxide for Highly Efficient Electrocatalytic Oxygen Evolution. *ACS*

*Catal.* **2018**, *8*, 3803-3811.

7. Tan, Y. W.; Wang, H.; Liu, P.; Shen, Y. H.; Cheng, C.; Hirata, A.; Fujita, T.; Tang, Z.; Chen, M. W., Versatile Nanoporous Bimetallic Phosphides towards Electrochemical Water Splitting. *Energ. Environ. Sci.* **2016**, *9*, 2257-2261.

8. Song, F.; Schenk, K.; Hu, X. L., A Nanoporous Oxygen Evolution Catalyst Synthesized by Selective Electrochemical Etching of Perovskite Hydroxide  $\text{CoSn}(\text{OH})_6$  Nanocubes. *Energ. Environ. Sci.* **2016**, *9*, 473-477.

9. Xu, H.; Wei, J. J.; Zhang, M.; Wang, J.; Shiraishi, Y.; Tian, L.; Du, Y., Self-Supported Nickel-Cobalt Nanowires as Highly Efficient and Stable Electrocatalysts for Overall Water Splitting. *Nanoscale* **2018**, *10*, 18767-18773.

10. Hu, X. M.; Zhang, S. L.; Sun, J. W.; Yu, L.; Qian, X. Y.; Hu, R. D.; Wang, Y. N.; Zhao, H. G.; Zhu, J. W., 2D Fe-Containing Cobalt Phosphide/Cobalt Oxide Lateral Heterostructure with Enhanced Activity for Oxygen Evolution Reaction. *Nano Energy* **2019**, *56*, 109-117.

11. Tahir, M.; Mahmood, N.; Pan, L.; Huang, Z. F.; Lv, Z.; Zhang, J. W.; Butt, F. K.; Shen, G. Q.; Zhang, X. W.; Dou, S. X.; Zou, J. J., Efficient Water Oxidation through Strongly Coupled Graphitic  $\text{C}_3\text{N}_4$  Coated Cobalt Hydroxide Nanowires. *J. Mater. Chem. A* **2016**, *4*, 12940-12946.
